# Supplementary material
Source: Springer Nature journal article supplement (https://www.springermedizin.de/resource/supplementary/12985_2008_533_MOESM8_ESM.pdf/9608306)

**Control****FITC****Evans blue****Merge****Duodenum**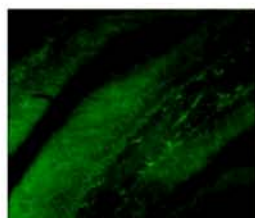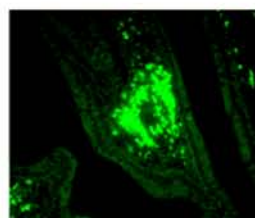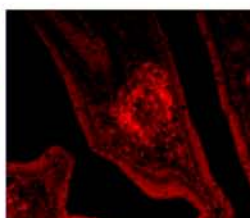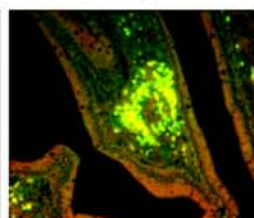**Jejunum**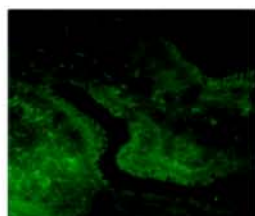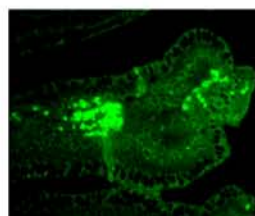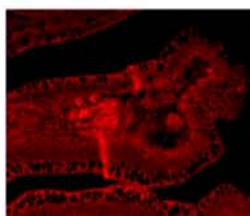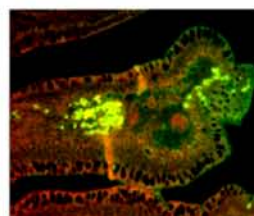**Cecum**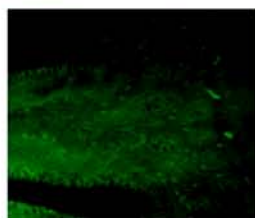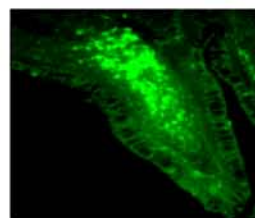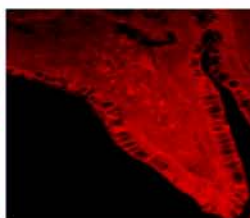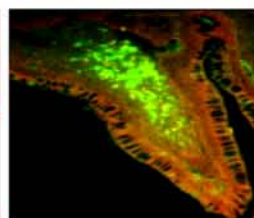**Lung**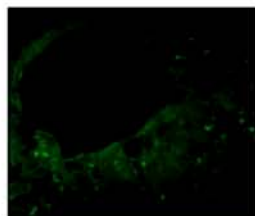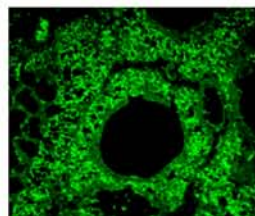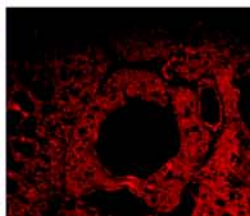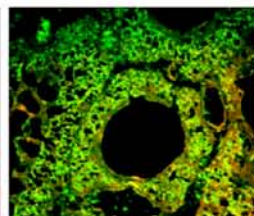**Bursa**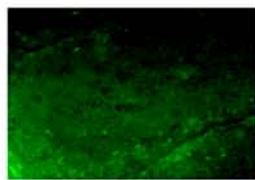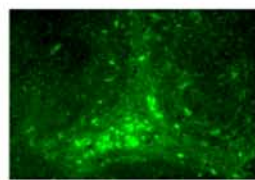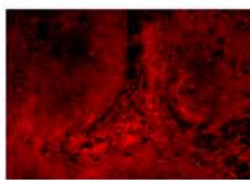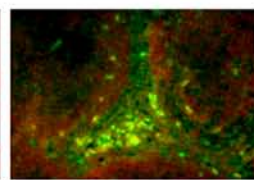**Kidney**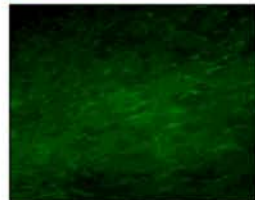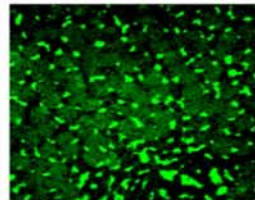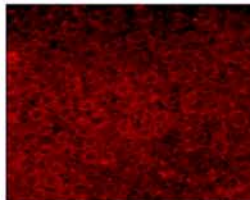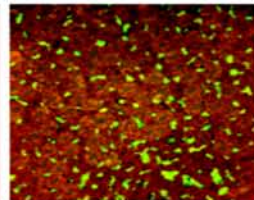**Liver**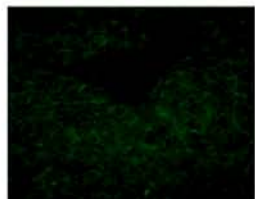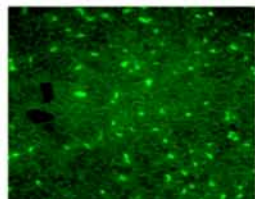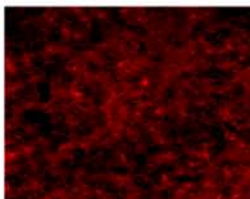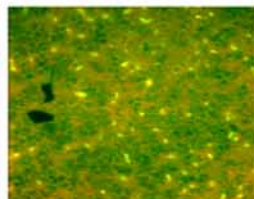**Myocardium**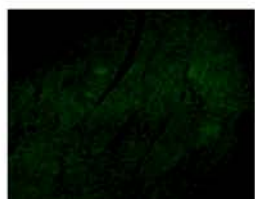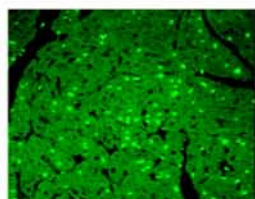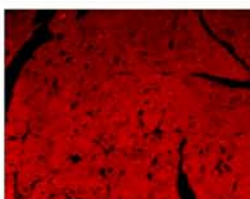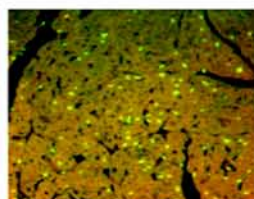

Supplement: MOESM8 [file 9608306]
